# Supplementary material
Source: PubMed Central journal article supplement (PMC6049814)
Supplement: NIHMS978345-supplement-01.pdf [file NIHMS978345-supplement-01.pdf]

1 **Supplementary Materials**

2

3 **Supplementary Materials and Methods**

4

5 **Acne lesion distribution on the face**

6 To define whether the nose is a clinically relevant anatomic site for acne lesions, we asked two  
7 independent medical staff, who are trained in dermatology, to review 61 randomly selected cases  
8 of acne vulgaris on the face from an electronic dermatology database, where images were  
9 submitted only by expert dermatologists. While the two reviewers gave an average acne score on  
10 the nose lower than the surrounding face (1.6 vs. 3.4, respectively), 70.5% of the faces examined  
11 had obvious acne lesions on the nose. This finding demonstrates that the nose is a common skin  
12 site affected by acne and supports that the nose is a relevant sampling site for studying acne.

13

14 **Vitamin B12 supplementation led to acne development in subject HL414**

15 Several previous studies suggested that vitamin B12 induces acne (21-26). Their conclusions  
16 were based on the observations that the induced acne occurred within a short period of time after  
17 vitamin B12 supplementation and disappeared quickly after the discontinuation of vitamin B12  
18 supplementation (21-26). We had the same clinical observations on subject HL414. This subject  
19 had clear skin prior to vitamin B12 supplementation. One week after vitamin B12  
20 supplementation, multiple erythematous papules and comedones developed on the face. After  
21 discontinuation of the vitamin B12 supplementation, the symptoms disappeared quickly. The  
22 subject had clear skin when we resampled the face three months later. Throughout this process,

23 board certified dermatologists determined the facial skin conditions and diagnosis at each time  
24 point. Our study was also consistent with the previous studies in that vitamin B12  
25 supplementation did not lead to acne development in all the subjects studied. We observed one  
26 out of ten subjects that had an acne breakout after vitamin B12 supplementation. Our observation  
27 of acne development in subject HL414 after vitamin B12 supplementation is highly consistent  
28 with the current literature.

29

### 30 **Total RNA extraction**

31 The follicular contents were individually picked from the pore strip using sterile forceps and  
32 placed in a 2 mL sterile microcentrifuge tube filled with ATL buffer (Qiagen) and glass beads  
33 (0.1mm diameter) (BioSpec Products, Inc.). Cells were lysed using a beadbeater for 3 minutes at  
34 4,800 rpm at room temperature. To avoid overheating the samples, the beadbeating was paused  
35 every 1 minute and the samples were placed on ice for at least 1 minute. After centrifugation at  
36 14,000 rpm for 5 minutes, the supernatant was retrieved and used for total RNA extraction.  
37 Twenty microliter proteinase K solution (Qiagen) was added, followed by incubation for 10  
38 minutes at 56°C. After incubation, 1 mL preheated QIAzol (Qiagen) at 65°C was added and  
39 incubated for 5 minutes at room temperature. The supernatant was then separated into two  
40 phases by adding 200µL chloroform and centrifuging at 12,000 g for 5 minutes at 4°C. The total  
41 RNA in the aqueous phase was then cleaned using RNA MinElute Clean-up kit (Qiagen)  
42 according to the manufacturer's instruction. After total RNA extraction, each sample was  
43 subjected to DNase digestion to remove residual genomic DNA contamination using TURBO  
44 DNA-free kit (Ambion).

45

46 **Ribosomal RNA (rRNA) depletion, RNA amplification and cDNA synthesis**

47 To enrich messenger RNA (mRNA), rRNA was depleted from the total RNA using  
48 MICROBExpress Kit (Ambion). The enriched mRNA was further polyadenylated and amplified  
49 by *in vitro* transcription-based mRNA linear amplification using MessageAmp II-Bacteria kit  
50 (Ambion). The amplified RNA was then converted to double-stranded cDNA using random  
51 hexamer (Promega) and SuperScript Double-Stranded cDNA synthesis kit (Life Technologies)  
52 (74, 75).

53

54 **RNA-Seq**

55 The cDNA libraries were prepared and sequenced using the Illumina sequencing platform  
56 (Illumina). The read length ranged from 82 – 101 bp, either single-end or paired-end (table S1).

57

58 **Data cleaning**

59 Sequence reads were trimmed from 3' end to remove low quality bases. Reads containing more  
60 than 90% of A/T within the entire sequence reads were removed. After trimming, cleaned  
61 sequence pairs, where both reads are longer than 40 bp and have fewer than three ambiguous  
62 base pairs, were used for further analysis.

63

64 **Functional classification of OGUs**

65 The representative protein sequence of each OGU was mapped against the COG database (76)  
66 and KEGG database (77) using BLASTP. The COG identifier or KEGG identifier of the best  
67 BLAST hit with an e-value  $< 1E-5$  was assigned to the corresponding OGU. If multiple hits were

68 found from non-overlapping regions of a query sequence, all of the COG or KEGG identifiers  
69 were assigned to the OGU.

70

### 71 **Rarefaction curve of the number of OGUs detected**

72 For each sample, a random number of sequence reads aligned to *P. acnes* genomes was sampled.  
73 The number of expressed unique OGUs represented by the sampled sequence reads was  
74 calculated using the R package Vegan 1.17-0 (78). The number of sequence reads randomly  
75 sampled was increased from 0 to the sequencing depth of each sample. The rarefaction curve of  
76 each sample was plotted using the number of expressed unique OGUs as a function of the  
77 number of sampled sequence reads. For all nine samples, rarefaction curves reached plateaus of  
78 detecting expressed *P. acnes* OGUs after sampling 100 million base pairs. Rarefaction analysis  
79 showed that our sequencing depth of the non-ribosomal transcripts of *P. acnes* (ranging from 232  
80 million base pairs to 2.4 billion base pairs) was sufficient for gene expression analysis (fig. S8).

81

### 82 **Unsupervised hierarchical clustering analysis**

83 For the clustering of the samples from the cross-sectional study, OGUs with detectable  
84 expression level ( $\geq 1$  after normalization) in at least five samples and with a large variation  
85 across samples (standard deviation  $\geq 150$ ) were used in the hierarchical clustering analysis. The  
86 clustering was performed using centered Pearson correlation similarity metric and average  
87 linkage clustering method. A total of 562 OGUs passed filtering criteria and were used for  
88 clustering analysis of the nine cross-sectional samples.

89

90 For the clustering of the samples from the vitamin B12 longitudinal study and the cross-sectional  
91 study, OGUs with detectable expression level ( $\geq 1$  after normalization) in all the 26 samples and  
92 with a large variation across samples (standard deviation  $\geq 200$ ) were used in the hierarchical  
93 clustering analysis. The clustering was performed using centered Pearson correlation similarity  
94 metric and average linkage clustering method. A total of 438 OGUs passed filtering criteria and  
95 were used for clustering analysis of the 26 RNA-Seq samples.

96

### 97 **Analysis of differentially expressed OGUs**

98 The expression levels of *P. acnes* OGUs in the RNA-Seq data were compared between samples  
99 from acne patients and samples from healthy individuals using the Student's t-test (unequal  
100 variance, two-sided test). Differentially expressed OGUs were identified using the criterion of  $P$   
101  $< 0.05$ . These differentially expressed OGUs were further confirmed by a Poisson model based  
102 comparison, ShotgunFunctionalizeR (72) in R package (<http://www.r-project.org>,  
103 <http://shotgun.zool.gu.se>), with a cutoff of Akaike's information criterion  $< 5,000$  and adjusted  $P$   
104  $< 0.05$ . The heat map of differentially expressed OGUs was generated using R package gplots  
105 (79) heatmap.2 function based on z scores.

106

107 The expression levels of *P. acnes* OGUs in the samples from the vitamin B12 longitudinal study  
108 were compared between the Day0 samples before vitamin B12 supplementation and the Day14  
109 samples after vitamin B12 supplementation. The statistical analysis was performed using the  
110 paired samples t-test (unequal variance, two-sided test). Differentially expressed OGUs were  
111 identified using the criterion of  $P < 0.05$ . We compared the expression levels of the OGUs only

112 if there were at least three pairs of samples with coverage of more than 10,000 bp (equivalent to  
113 ~100 reads) on the OGU to accurately quantify the gene expression changes (80).

114

115 The expression levels of *P. acnes* OGUs in sample HL414-Day14 were compared to the other  
116 Day14 samples using one sample Student's t-test (unequal variance, two sided test). The  
117 differential gene expression was determined with a false discovery rate < 5%. The same OGU  
118 coverage requirement as stated above was applied.

119

### 120 **Analysis of differentially expressed pathways**

121 An online functional annotation clustering analysis, DAVID (19) was used to identify the  
122 metabolic pathways and functional annotation clusters that were enriched in the differentially  
123 expressed gene set between acne patients and healthy individuals. The enriched metabolic  
124 pathways and functional annotation clusters had enrichment scores ranging from 0.1 to 0.8.

125 Vitamin B12 biosynthesis and porphyrin metabolic process had an enrichment score of 0.41.

126 Additionally, we used ShotgunFunctionalizeR pathway-centric analysis to identify differentially  
127 expressed metabolic pathways with a cutoff of Akaike's information criterion < 5,000 and  
128 adjusted  $P < 0.05$ . This package was used previously to compare metabolic pathway differences  
129 in metatranscriptomic data (72).

130

### 131 **KEGG pathway mapping**

132 The global KEGG metabolic pathways were mapped using iPath2 (81).

133

### 134 **Determination of cobalt's effect on porphyrin biosynthesis in *P. acnes* cultures**

135 The effect of cobalt on porphyrin biosynthesis in *P. acnes* cultures was determined using the  
136 method by Zaitseva *et al.* (38) with minor modifications. *P. acnes* was cultured in reinforce  
137 clostridium broth anaerobically to stationary phase. The cells were harvested by centrifugation,  
138 washed twice with sterile 0.1M sodium phosphate buffer (pH 7.0), and then re-suspended in a  
139 synthetic broth without carbon sources for a preliminary starvation. The composition of the  
140 synthetic broth is 0.1 M sodium phosphate buffer, 3 g/L (NH<sub>4</sub>)<sub>2</sub>SO<sub>4</sub>, 0.48 g/L KH<sub>2</sub>PO<sub>4</sub>, 0.48 g/L  
141 K<sub>2</sub>HPO<sub>4</sub>, 0.2 g/L MgSO<sub>4</sub>, 0.01 g/L NaCl, and 0.01 g/L MnSO<sub>4</sub>. After being maintained in the  
142 synthetic medium for 24 hours at 30°C anaerobically, the cells were centrifuged, washed, and re-  
143 suspended in a fresh synthetic broth with supplementation of 2% lactose as carbon sources and  
144 5,6-dimethylbenzimidazole (5,6-DMB). Then the cell suspension was evenly distributed to two  
145 experimental conditions: without additional supplementation (control), and with 10 mg/L  
146 CoCl<sub>2</sub>·6H<sub>2</sub>O added. The cells were incubated at 30°C for 48 hours anaerobically. The porphyrin  
147 production in each culture was then measured as described earlier. Since the bacterial cells were  
148 cultured in a synthetic medium, at a lower temperature, and in a shorter period of time, the  
149 porphyrins produced in this experiment were expected to be much less than in a regular culture  
150 condition.

151

152

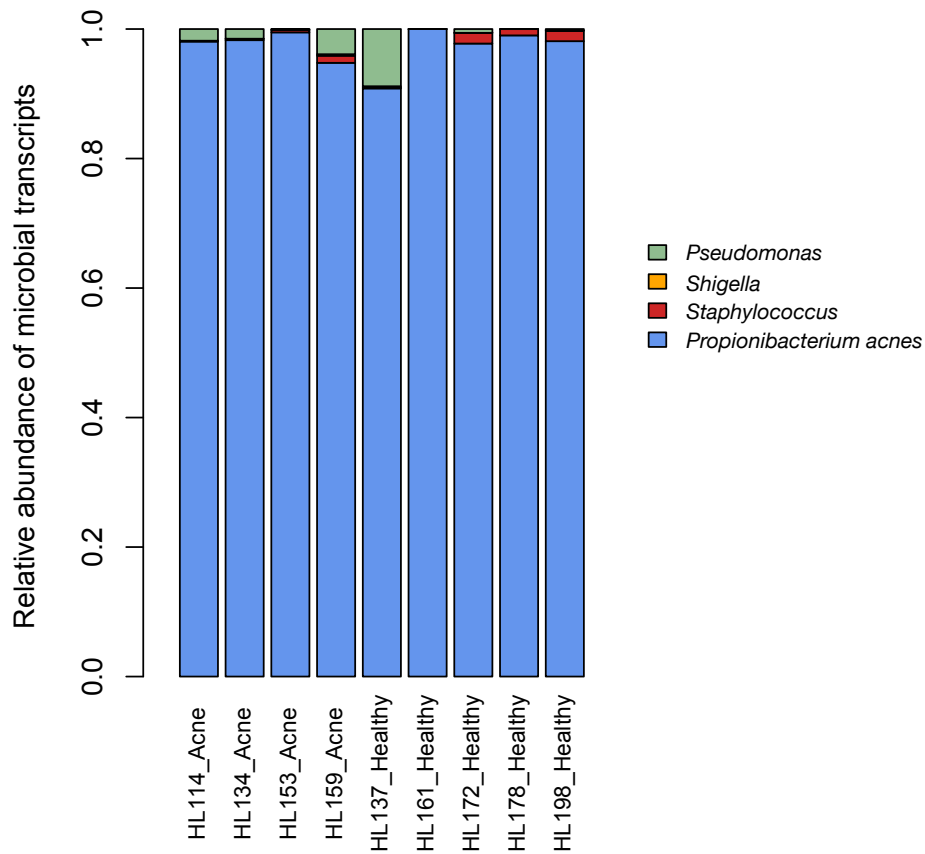

153

154 **Fig. S1. The metatranscriptome composition of the skin microbiota in follicles.**

155 *P. acnes* transcripts are the most abundant microbial transcripts in all samples (>90%).

156 Additionally, we identified transcripts mapped to several other bacteria, including

157 *Staphylococcus*, *Shigella*, and *Pseudomonas*.

158

159

160

161



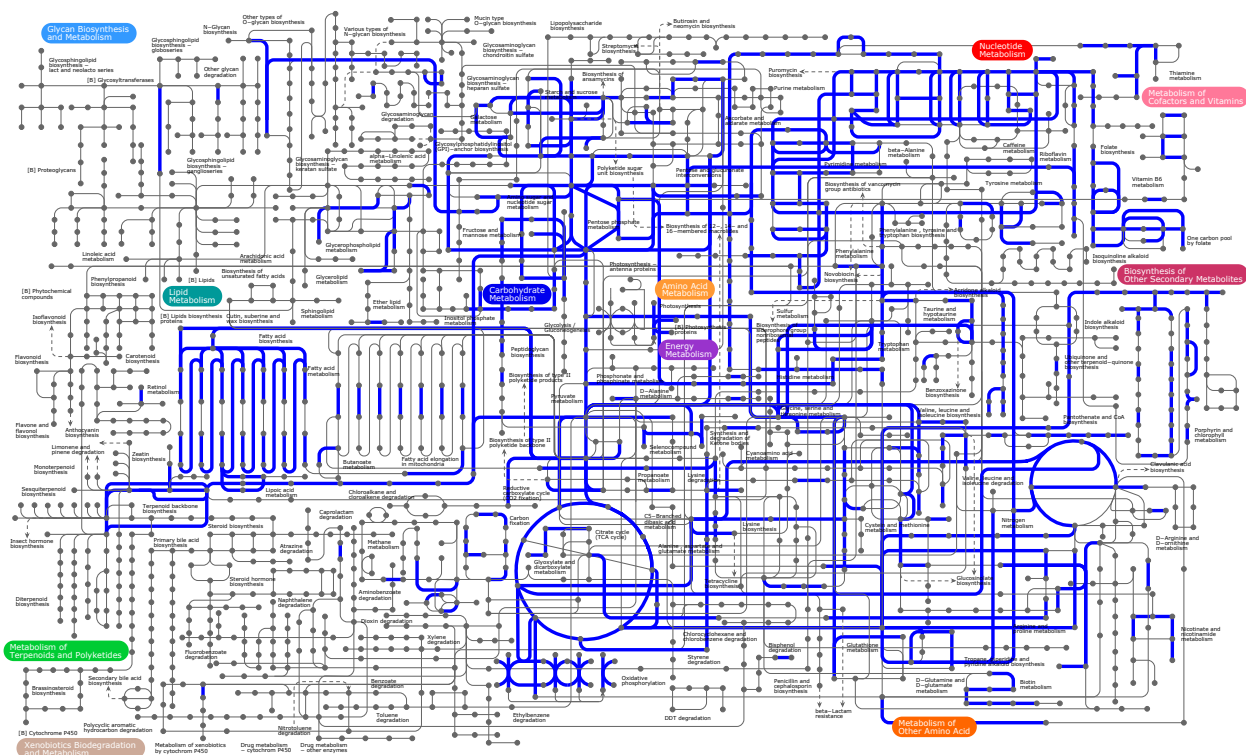

162 **Fig. S2. The KEGG pathways expressed in all the samples.**

163 The core *P. acnes* transcriptome shared by all the samples covered most of the metabolic  
 164 pathways (blue lines), including sugar metabolism, nucleic acid metabolism, amino acid  
 165 metabolism, lipid metabolism, and the metabolism of cofactors and vitamins.

166

167

168

169

170

171

172

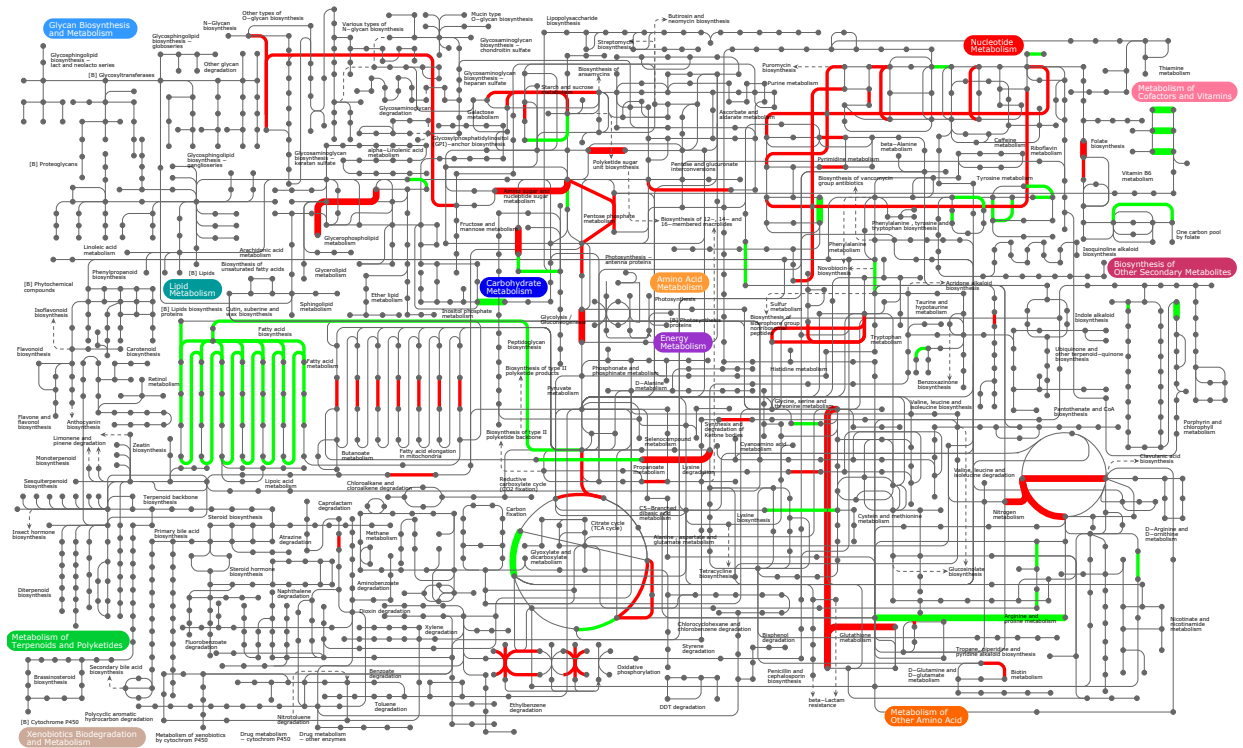

174

175 **Fig. S3. The KEGG pathways with differentially expressed *P. acnes* OGU.**

176 Thick red lines indicate the up-regulated OGU in the acne patients with  $P < 0.05$ . Thin red lines  
 177 indicate the up-regulated OGU in the acne patients with  $0.05 \leq P < 0.1$ . Thick green lines  
 178 indicate the down-regulated OGU with  $P < 0.05$ . Thin green lines indicate the down-regulated  
 179 OGU with  $0.05 \leq P < 0.1$ .

180

181

182

183

184

185

186

187

188

189 **Fig. S4. *cob/cbi* operons in *P. acnes*.**

190 The *cob/cbi* operons in *P. acnes* genome are shown. Green boxes represent the genes in vitamin  
 191 B12 biosynthesis pathway. Purple boxes represent the genes encoding transporters. Among the  
 192 transporter genes, PAGK\_0441, PAGK\_0442, and PAGK\_0443 encode an iron complex  
 193 transporter, and PAGK\_0446, PAGK\_0447, PAGK\_0448, and PAGK\_0449 encode a cobalt  
 194 transporter. White boxes indicate genes with unclear functions in the vitamin B12 biosynthesis  
 195 pathway. Among them, PAGK\_0444 encodes AAA family ATPase, while PAGK\_0439,  
 196 PAGK\_0440, and PAGK\_0450 encode hypothetical proteins. The number below each box  
 197 indicates the gene ID in HL096PA1 genome (82). The single letters in the boxes indicate *cbi*  
 198 gene names. The black arrows indicate predicted cobalamin riboswitches. The gene IDs of *cbiL*,  
 199 *cbiX+cysG*, and *btuR* are 435, 438, and 452, respectively. They are all located in the operons  
 200 under the control of cobalamin riboswitches.

201

202

203

204

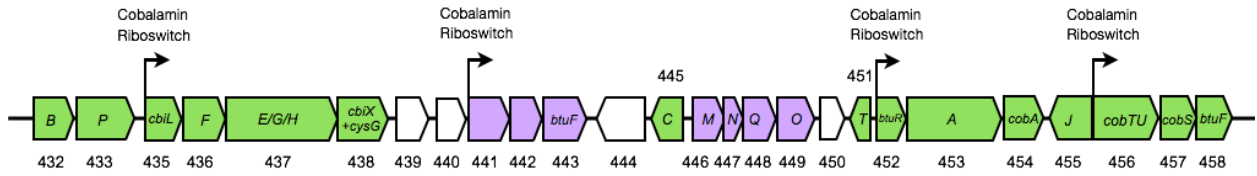

205

206

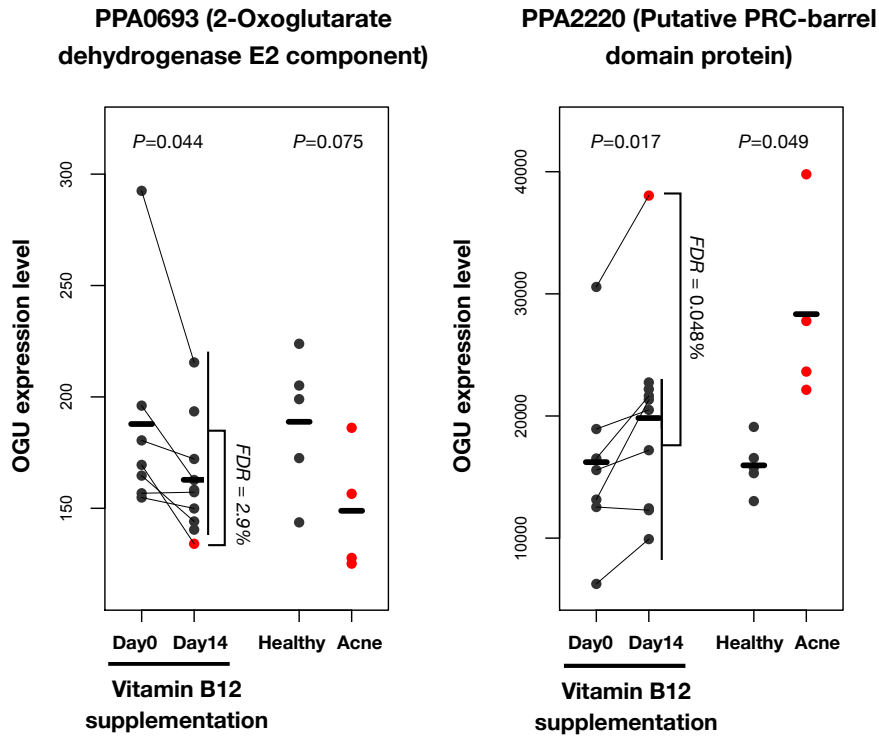

207

208 **Fig. S5. Differentially expressed *P. acnes* OGUs in sample HL414-Day14 compared to the**  
209 **other Day14 samples.**

210 The expression levels of the OGUs were plotted for four groups of samples: samples from the  
211 healthy subjects before vitamin B12 supplementation (Day0) ( $n=7$ ), samples from the healthy  
212 subjects 14 days after vitamin B12 supplementation (Day14) ( $n=10$ ), samples from the healthy  
213 individuals in the cross-sectional study (Healthy) ( $n=5$ ), and samples from the acne patients  
214 (Acne) ( $n=4$ ). The mean expression level of each OGU is indicated by a thick black bar. The  
215 Day0 sample and the Day14 sample from the same individual were connected by a line.

216 Significance was determined by Student's t-test. Red dots indicate the samples collected from the  
217 acne patients or subject HL414 after vitamin B12 supplementation (HL414-Day14). Black dots  
218 indicate the samples collected from the healthy subjects. FDR: false discovery rate.

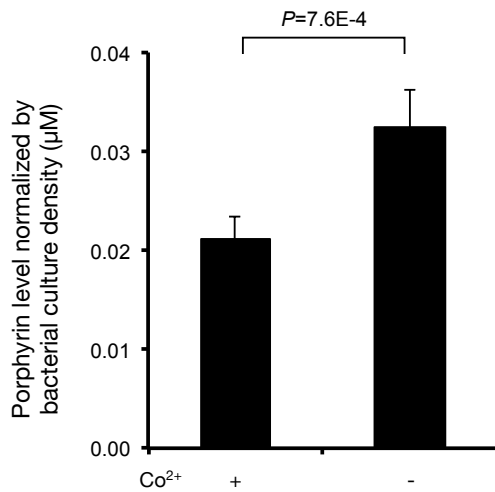

219 **Fig. S6. The biosynthesis of porphyrins is inversely correlated with the biosynthesis of**  
220 **vitamin B12 in *P. acnes*.**

221 Depletion of cobalt, which inhibits vitamin B12 biosynthesis, significantly increased porphyrin  
222 production in *P. acnes*. Significance was determined by Student's t-test. Data are presented as  
223 the mean  $\pm$  standard deviation of five biological replicates ( $n=5$ ).

224

225

226

227

228

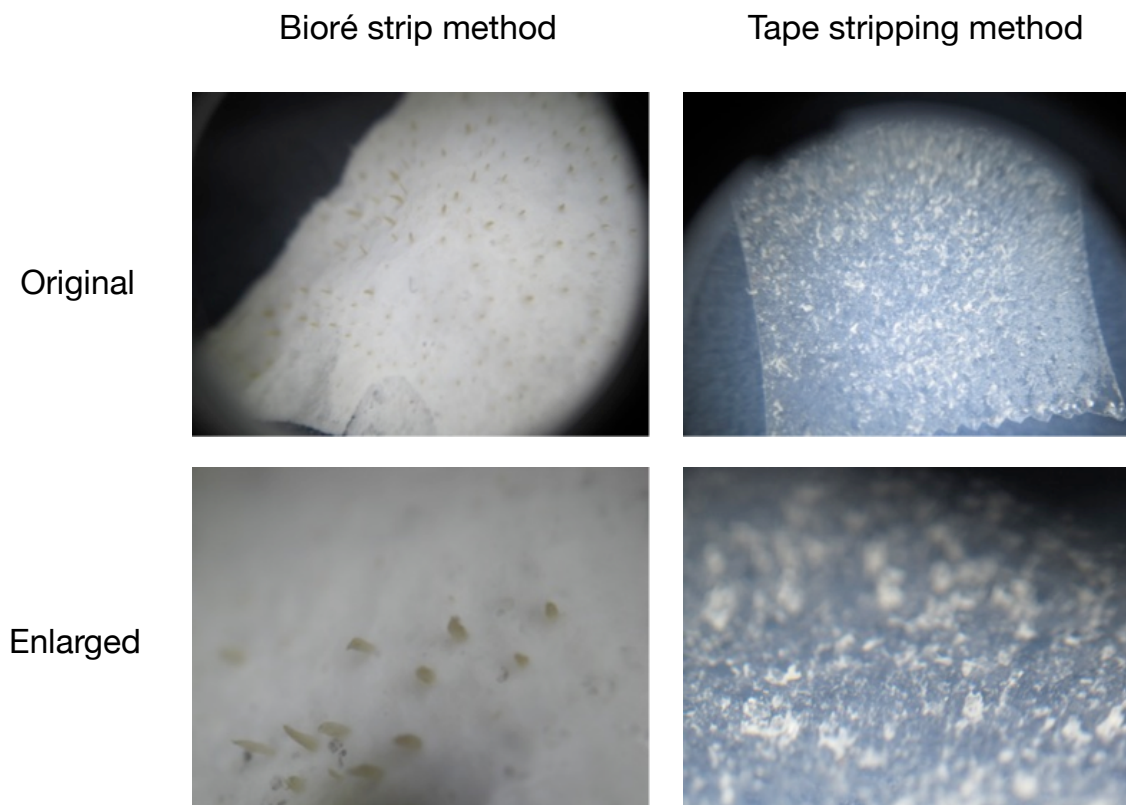

229

230 **Fig. S7. A comparison of the samples collected from opposite sides of the nose of the same**  
 231 **individual using a Biore strip method and a tape stripping method.**

232 Samples from opposite sides of the nose of the same individual were obtained using the Biore  
 233 strip method and the tape stripping method. As shown, the tape stripping method removes  
 234 keratinocytes from the surface of the skin, sampling the stratum corneum of the epidermis. In  
 235 contrast, the Biore strip method removes the contents of follicles to a depth of ~2 mm. It samples  
 236 the microbiota residing inside follicles, including the anaerobic portion.

237

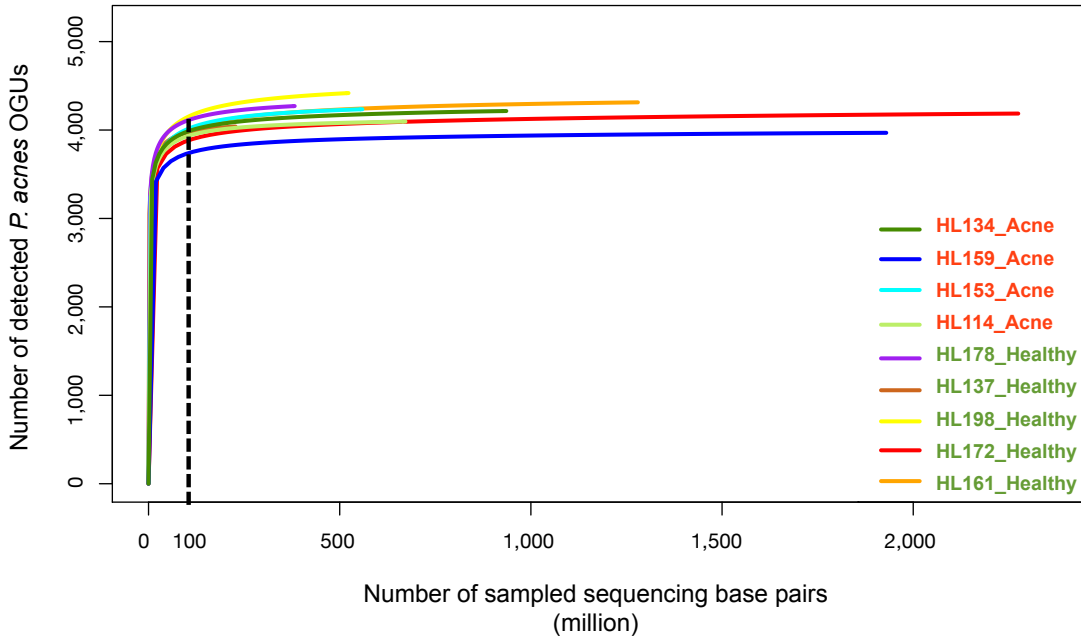

238

239 **Fig. S8. Rarefaction curves indicate sufficient sequencing depths of the samples.**

240 The rarefaction curves of all nine samples reached plateaus in detecting *P. acnes* OGUs with  
 241 more than 100 million base pairs. This suggests that the sequencing depths of all these samples  
 242 (with minimum 232 million base pairs) were sufficient for the gene expression analysis.

243

244

245

246

247

248

249

250 **Table S1. High sequencing depths of the metatranscriptomic data.**

| <b>Sample name</b> | <b>Subject type</b> | <b>Read length (bp)</b> | <b>Number of paired-end reads in raw data (million)</b> | <b>Number of paired-end reads in cleaned data (million)</b> |
|--------------------|---------------------|-------------------------|---------------------------------------------------------|-------------------------------------------------------------|
| HL114              | acne                | 84                      | 52                                                      | 42                                                          |
| HL134              | acne                | 100                     | 170                                                     | 96                                                          |
| HL153              | acne                | 84                      | 66                                                      | 48                                                          |
| HL159              | acne                | 100                     | 160                                                     | 136                                                         |
| HL137              | healthy             | 84                      | 44                                                      | 32                                                          |
| HL161              | healthy             | 84                      | 72                                                      | 50                                                          |
| HL178              | healthy             | 82                      | 58                                                      | 46                                                          |
| HL172              | healthy             | 100                     | 182                                                     | 148                                                         |
| HL198              | healthy             | 84                      | 52                                                      | 44                                                          |

251

252

253

254

255

256

257

258

259

260

261

262

263

264

265



**Table S2. Differentially expressed OGUs shown in Fig. 1B.**

| <b>Annotation (following the Figure 1B heatmap row order)</b>                      | <b>OGU expression change</b>  |
|------------------------------------------------------------------------------------|-------------------------------|
| hypothetical protein                                                               | up-regulated in acne patients |
| hypothetical protein                                                               | up-regulated in acne patients |
| hypothetical protein                                                               | up-regulated in acne patients |
| hypothetical protein PPA1279                                                       | up-regulated in acne patients |
| hypothetical protein                                                               | up-regulated in acne patients |
| RHS repeat-associated core domain protein                                          | up-regulated in acne patients |
| 30S ribosomal protein S13                                                          | up-regulated in acne patients |
| lipoprotein releasing system, ATP-binding protein                                  | up-regulated in acne patients |
| transcription termination/antitermination factor NusG                              | up-regulated in acne patients |
| 50S ribosomal protein L4                                                           | up-regulated in acne patients |
| hypothetical protein PPA2373                                                       | up-regulated in acne patients |
| putative ABC-type sugar transport system, permease component                       | up-regulated in acne patients |
| hypothetical protein                                                               | up-regulated in acne patients |
| conserved hypothetical protein                                                     | up-regulated in acne patients |
| hypothetical protein HMPREF0675_4689                                               | up-regulated in acne patients |
| conserved hypothetical protein                                                     | up-regulated in acne patients |
| hypothetical protein HMPREF0675_5344                                               | up-regulated in acne patients |
| hypothetical protein PPA2385                                                       | up-regulated in acne patients |
| lipid A export permease/ATP-binding protein MsbA                                   | up-regulated in acne patients |
| CobQ/CobB/MinD/ParA nucleotide binding domain protein                              | up-regulated in acne patients |
| ring hydroxylating dioxygenase, alpha subunit, rieske family                       | up-regulated in acne patients |
| ATP-dependent Clp protease, ATP-binding subunit ClpX                               | up-regulated in acne patients |
| hypothetical protein PPA2302                                                       | up-regulated in acne patients |
| conserved domain protein                                                           | up-regulated in acne patients |
| ATPase of the AAA family protein                                                   | up-regulated in acne patients |
| seryl-tRNA synthetase                                                              | up-regulated in acne patients |
| hypothetical protein PPA1082                                                       | up-regulated in acne patients |
| maltose phosphorylase                                                              | up-regulated in acne patients |
| putative amino acid permease                                                       | up-regulated in acne patients |
| PTS system, mannitol-specific IIABC component                                      | up-regulated in acne patients |
| phosphoenolpyruvate-dependent sugar phosphotransferase system, EIIA                | up-regulated in acne patients |
| putative hydrolase, NUDIX family                                                   | up-regulated in acne patients |
| HTH-type transcriptional regulator MalR (Maltose operon transcriptional repressor) | up-regulated in acne patients |
| oxoglutarate dehydrogenase (succinyl-transferring), E1 component                   | up-regulated in acne patients |
| ribosomal protein L22                                                              | up-regulated in acne patients |

|                                                             |                               |
|-------------------------------------------------------------|-------------------------------|
| toxin-antitoxin system, toxin component, HicA family        | up-regulated in acne patients |
| hypothetical protein                                        | up-regulated in acne patients |
| hypothetical protein                                        | up-regulated in acne patients |
| dihydroneopterin aldolase                                   | up-regulated in acne patients |
| aminopeptidase N                                            | up-regulated in acne patients |
| hypothetical protein                                        | up-regulated in acne patients |
| aerotolerance protein BatA                                  | up-regulated in acne patients |
| excinuclease ABC subunit A                                  | up-regulated in acne patients |
| hypothetical protein PPA1344                                | up-regulated in acne patients |
| mannose-6-phosphate isomerase, class I                      | up-regulated in acne patients |
| preprotein translocase subunit SecD                         | up-regulated in acne patients |
| conserved hypothetical protein                              | up-regulated in acne patients |
| hypothetical protein                                        | up-regulated in acne patients |
| hemin import ATP-binding protein HmuV                       | up-regulated in acne patients |
| hypothetical protein                                        | up-regulated in acne patients |
| conserved hypothetical protein                              | up-regulated in acne patients |
| hypothetical protein                                        | up-regulated in acne patients |
| sodium/alanine symporter family protein                     | up-regulated in acne patients |
| conserved hypothetical protein                              | up-regulated in acne patients |
| hypothetical protein                                        | up-regulated in acne patients |
| conserved hypothetical protein                              | up-regulated in acne patients |
| preprotein translocase subunit SecA                         | up-regulated in acne patients |
| phosphoglucosamine mutase                                   | up-regulated in acne patients |
| hypothetical protein PPA1121                                | up-regulated in acne patients |
| ATP-dependent Clp protease proteolytic subunit              | up-regulated in acne patients |
| hypothetical membrane-spanning protein                      | up-regulated in acne patients |
| putative PRC-barrel domain protein                          | up-regulated in acne patients |
| lysine-specific permease                                    | up-regulated in acne patients |
| putative transport protein                                  | up-regulated in acne patients |
| ion channel membrane protein                                | up-regulated in acne patients |
| preprotein translocase subunit SecY                         | up-regulated in acne patients |
| preprotein translocase subunit SecF                         | up-regulated in acne patients |
| ribosomal protein L23                                       | up-regulated in acne patients |
| ABC transporter, permease/ATP-binding protein               | up-regulated in acne patients |
| DNA-directed RNA polymerase, beta subunit                   | up-regulated in acne patients |
| ribosomal protein S4                                        | up-regulated in acne patients |
| glycine betaine/L-proline ABC transporter, permease protein | up-regulated in acne patients |
| DNA-binding response regulator TrcR                         | up-regulated in acne patients |

|                                                                                   |                                 |
|-----------------------------------------------------------------------------------|---------------------------------|
| conserved hypothetical protein                                                    | up-regulated in acne patients   |
| hypothetical protein PPA1391                                                      | up-regulated in acne patients   |
| arginine deiminase                                                                | up-regulated in acne patients   |
| conserved hypothetical protein                                                    | up-regulated in acne patients   |
| putative polysaccharide deacetylase                                               | up-regulated in acne patients   |
| protein associated to putative adhesion protein                                   | up-regulated in acne patients   |
| substrate binding component of glycine/betaine transport system                   | up-regulated in acne patients   |
| conserved hypothetical protein                                                    | up-regulated in acne patients   |
| putative glucoamylase S1/S2 precursor                                             | up-regulated in acne patients   |
| hypothetical protein HMPREF0675_3620                                              | up-regulated in acne patients   |
| putative membrane protein                                                         | up-regulated in acne patients   |
| sugar transport permease BglB                                                     | up-regulated in acne patients   |
| conserved domain protein                                                          | up-regulated in acne patients   |
| hypothetical protein PPA1052                                                      | up-regulated in acne patients   |
| hypothetical protein                                                              | up-regulated in acne patients   |
| putative lipoprotein                                                              | up-regulated in acne patients   |
| conserved hypothetical protein                                                    | up-regulated in acne patients   |
| hypothetical protein HMPREF0675_5050                                              | up-regulated in acne patients   |
| ATP-dependent Clp protease proteolytic subunit 2                                  | up-regulated in acne patients   |
| carbamate kinase                                                                  | up-regulated in acne patients   |
| putative outer membrane protein probably involved in nutrient binding             | up-regulated in acne patients   |
| glucose-6-phosphate dehydrogenase                                                 | up-regulated in acne patients   |
| hypothetical protein                                                              | up-regulated in acne patients   |
| glycogen debranching enzyme GlgX                                                  | up-regulated in acne patients   |
| binding-protein-dependent transport system inner membrane component               | up-regulated in acne patients   |
| hypothetical protein                                                              | up-regulated in acne patients   |
| conserved hypothetical protein                                                    | up-regulated in acne patients   |
| ornithine carbamoyltransferase                                                    | up-regulated in acne patients   |
| putative lipase                                                                   | up-regulated in acne patients   |
| transporter, small conductance mechanosensitive ion channel (MscS) family protein | up-regulated in acne patients   |
| hypothetical protein PPA0695                                                      | up-regulated in acne patients   |
| undecaprenyl-diphosphatase UppP                                                   | up-regulated in acne patients   |
| tRNA adenylyltransferase                                                          | up-regulated in acne patients   |
| drug resistance transporter, EmrB/QacA subfamily                                  | up-regulated in acne patients   |
| HTH domain protein                                                                | up-regulated in acne patients   |
| hypothetical protein PPA0150                                                      | up-regulated in acne patients   |
| methylmalonyl-CoA carboxyltransferase 1                                           | down-regulated in acne patients |

|                                                                       |                                 |
|-----------------------------------------------------------------------|---------------------------------|
| fumarate hydratase                                                    | down-regulated in acne patients |
| acetyltransferase, GNAT family                                        | down-regulated in acne patients |
| conserved hypothetical protein                                        | down-regulated in acne patients |
| oxidoreductase, aldo/keto reductase family                            | down-regulated in acne patients |
| iron chelate uptake ABC transporter, FeCT family, permease protein    | down-regulated in acne patients |
| hypothetical protein PPA0496                                          | down-regulated in acne patients |
| RNA methyltransferase, RsmD family                                    | down-regulated in acne patients |
| toxin-antitoxin system, antitoxin component, MerR family              | down-regulated in acne patients |
| pyridoxal kinase                                                      | down-regulated in acne patients |
| cob(I)yrinic acid a,c-diamide adenosyltransferase                     | down-regulated in acne patients |
| hypothetical protein PPA1537                                          | down-regulated in acne patients |
| aspartyl-tRNA synthetase                                              | down-regulated in acne patients |
| hypothetical protein PPA1660                                          | down-regulated in acne patients |
| putative bacterial extracellular solute-binding protein               | down-regulated in acne patients |
| putative bacteriochlorophyll 4-vinyl reductase                        | down-regulated in acne patients |
| ABC transporter, ATP-binding protein                                  | down-regulated in acne patients |
| putative NADH-dependent dehydrogenase                                 | down-regulated in acne patients |
| cobalt ABC transporter, permease protein CbiQ                         | down-regulated in acne patients |
| putative membrane protein                                             | down-regulated in acne patients |
| hypothetical protein PPA0745                                          | down-regulated in acne patients |
| ATPase related to phosphate starvation-inducible protein, PhoH family | down-regulated in acne patients |
| deoxycytidylate deaminase (dCMP deaminase)                            | down-regulated in acne patients |
| glutamate 5-kinase                                                    | down-regulated in acne patients |
| hypothetical protein PPA0478                                          | down-regulated in acne patients |
| putative transcriptional regulator, LacI family                       | down-regulated in acne patients |
| HAD-superfamily hydrolase, subfamily IIB                              | down-regulated in acne patients |

267

268

269

270

271

272

273 **Table S3. Full names of the genes and substrates shown in Fig. 2.**

| Abbreviation      | Full name                                                                  |
|-------------------|----------------------------------------------------------------------------|
| 2-OG              | 2-Oxoglutarate                                                             |
| 3P-D-gly          | 3-Phospho-D-glyceroyl phosphate                                            |
| 5-ALA             | 5-Aminolevulinate                                                          |
| Acetyl-acp        | Acetyl-[acyl-carrier protein]                                              |
| AMT               | aminomethyltransferase [EC:2.1.2.10]                                       |
| b-D-Fru-1,6P      | beta-D-Fructose 1,6-bisphosphate                                           |
| b-D-Fru-6P        | beta-D-Fructose 6-phosphate                                                |
| <i>bmpA</i>       | basic membrane protein A                                                   |
| <i>cbiB, cobD</i> | adenosylcobinamide-phosphate synthase [EC:6.3.1.10]                        |
| <i>cbiM</i>       | cobalt/nickel transport system permease protein                            |
| <i>cbiN</i>       | cobalt transport protein                                                   |
| <i>cbiO</i>       | cobalt/nickel transport system ATP-binding protein                         |
| <i>cbiQ</i>       | cobalt/nickel transport system permease protein                            |
| <i>clp1</i>       | ATP-dependent Clp protease proteolytic subunit [EC:3.4.21.92]              |
| <i>clp2</i>       | ATP-dependent Clp protease proteolytic subunit [EC:3.4.21.92]              |
| <i>clpX</i>       | ATP-dependent protease ATP-binding subunit ClpX                            |
| Co <sup>2+</sup>  | Cobalt ion                                                                 |
| <i>cobA-hemD</i>  | uroporphyrinogen III methyltransferase / synthase [EC:2.1.1.107 4.2.1.75]  |
| <i>cobB-cbiA</i>  | cobyrinic acid a,c-diamide synthase [EC:6.3.5.9 6.3.5.11]                  |
| <i>cobH, cbiC</i> | precorrin-8X methylmutase [EC:5.4.1.2]                                     |
| <i>cobI-cbiL</i>  | precorrin-2/cobalt-factor-2 C20-methyltransferase [EC:2.1.1.130 2.1.1.151] |
| <i>cobK, cbiJ</i> | precorrin-6X reductase [EC:1.3.1.54]                                       |
| <i>cobM, cbiF</i> | precorrin-4 C11-methyltransferase [EC:2.1.1.133]                           |
| <i>cobO, btuR</i> | cob(I)alamin adenosyltransferase [EC:2.5.1.17]                             |
| <i>cobQ, cbiP</i> | adenosylcobyrinic acid synthase [EC:6.3.5.10]                              |
| <i>cobS, cobV</i> | adenosylcobinamide-GDP ribazoletransferase [EC:2.7.8.26]                   |
| COX15             | cytochrome c oxidase assembly protein subunit 15                           |
| CS                | citrate synthase [EC:2.3.3.1]                                              |
| <i>cyoE</i>       | protoheme IX farnesyltransferase [EC:2.5.1.-]                              |
| <i>cysG</i>       | uroporphyrin-III C-methyltransferase [EC:2.1.1.107 1.3.1.76 4.99.1.4]      |
| <i>cysG+cbiX</i>  | fusion gene of <i>cysG</i> and <i>cbiX</i> , cobalamin synthesis protein   |
| DLST              | 2-oxoglutarate dehydrogenase E2 component [EC:2.3.1.61]                    |
| E1.7.2.1          | nitrite reductase (NO-forming) [EC:1.7.2.1]                                |
| FA                | Fatty acid                                                                 |
| <i>fabD</i>       | [acyl-carrier-protein] S-malonyltransferase [EC:2.3.1.39]                  |

|                     |                                                                        |
|---------------------|------------------------------------------------------------------------|
| <i>fabF</i>         | 3-oxoacyl-[acyl-carrier-protein] synthase II [EC:2.3.1.179]            |
| <i>fabG</i>         | 3-oxoacyl-[acyl-carrier protein] reductase [EC:1.1.1.100]              |
| <i>fabZ</i>         | (3R)-hydroxymyristoyl-[acyl-carrier-protein] dehydratase [EC:4.2.1.59] |
| FhuB                | ABC-type iron transporter, permease protein                            |
| FhuC                | ABC-type iron transporter; ATP-binding protein [EC:3.6.3.34]           |
| FhuD                | ABC-type iron transporter, substrate-binding protein                   |
| <i>ftsY</i>         | fused signal recognition particle receptor                             |
| <i>fumC</i>         | fumarate hydratase, class II [EC:4.2.1.2]                              |
| GAPDH               | glyceraldehyde 3-phosphate dehydrogenase [EC:1.2.1.12]                 |
| <i>gdhA</i>         | glutamate dehydrogenase (NADP+) [EC:1.4.1.4]                           |
| <i>glpK</i>         | glycerol kinase [EC:2.7.1.30]                                          |
| Gly-3P              | D-Glyceraldehyde 3-phosphate                                           |
| <i>gudB, rocG</i>   | glutamate dehydrogenase [EC:1.4.1.2]                                   |
| <i>hemA</i>         | glutamyl-tRNA reductase [EC:1.2.1.70]                                  |
| <i>hemB</i>         | porphobilinogen synthase [EC:4.2.1.24]                                 |
| <i>hemC</i>         | hydroxymethylbilane synthase [EC:2.5.1.61]                             |
| <i>hemD</i>         | uroporphyrinogen-III synthase [EC:4.2.1.75]                            |
| <i>hemE</i>         | uroporphyrinogen decarboxylase [EC:4.1.1.37]                           |
| <i>hemH</i>         | ferrochelatase [EC:4.99.1.1]                                           |
| <i>hemL</i>         | glutamate-1-semialdehyde 2,1-aminomutase [EC:5.4.3.8]                  |
| <i>hemN</i>         | oxygen-independent coproporphyrinogen III oxidase [EC:1.3.99.22]       |
| <i>hemY</i>         | oxygen-dependent protoporphyrinogen oxidase [EC:1.3.3.4]               |
| HmuT                | ABC-type iron transporter, substrate-binding protein                   |
| HmuU                | ABC-type iron transporter, permease component                          |
| HmuV                | ABC-type iron transporter; ATP-binding protein [EC:3.6.3.34]           |
| HtaA                | HtaA, for Fe transport, (PPA0779)                                      |
| IDH1                | isocitrate dehydrogenase [EC:1.1.1.42]                                 |
| Malonyl- <i>acp</i> | Malonyl-[acyl-carrier protein]                                         |
| <i>manA</i>         | mannose-6-phosphate isomerase [EC:5.3.1.8]                             |
| MDT1                | multidrug transporter                                                  |
| MDT2                | multidrug transporter                                                  |
| MDT3                | multidrug transporter                                                  |
| MDT4                | multidrug transporter                                                  |
| MFS ST1             | the major facilitator superfamily (MFS) sugar transporter              |
| MFS ST2             | the major facilitator superfamily (MFS) sugar transporter              |
| N <sub>2</sub>      | Nitrogen                                                               |
| N <sub>2</sub> O    | Nitrous oxide                                                          |
| <i>narG</i>         | nitrate reductase, alpha subunit [EC:1.7.99.4]                         |

|                 |                                                        |
|-----------------|--------------------------------------------------------|
| narH            | nitrate reductase, beta subunit [EC:1.7.99.4]          |
| narI            | nitrate reductase, gamma subunit [EC:1.7.99.4]         |
| narJ            | nitrate reductase, delta subunit                       |
| NH <sub>3</sub> | Ammonia                                                |
| NO              | Nitrogen monoxide                                      |
| NO <sub>2</sub> | Nitrite                                                |
| NO <sub>3</sub> | Nitrate                                                |
| norB            | nitric oxide reductase subunit B [EC:1.7.2.5]          |
| OGDH            | 2-oxoglutarate dehydrogenase E1 component [EC:1.2.4.2] |
| PFK             | 6-phosphofructokinase [EC:2.7.1.11]                    |
| PP              | Protoporphyrin; Protoporphyrin IX                      |
| PTS-Mtl-EIIA    | PTS system, mannitol-specific IIA component            |
| PTS-Mtl-EIIABC  | PTS system, mannitol-specific IIBC component           |
| PTS-Nag-EI      | PTS system, N-acetylglucosamine-specific IIB component |
| secA            | preprotein translocase subunit SecA                    |
| secD            | preprotein translocase subunit SecD                    |
| secE            | preprotein translocase subunit SecE                    |
| secF            | preprotein translocase subunit SecF                    |
| secG            | preprotein translocase subunit SecG                    |
| secY            | preprotein translocase subunit SecY                    |
| SRP54, ffh      | signal recognition particle subunit SRP54              |
| ST1P            | ABC-type sugar transporter, permease protein           |
| ST1P1           | ABC-type sugar transporter, permease protein           |
| ST1S            | ABC-type sugar transporter, substrate-binding protein  |
| ST2A            | ABC-type sugar transporter, ATP-binding protein        |
| ST2P            | ABC-type sugar transporter, permease protein           |
| ST2P1           | ABC-type sugar transporter, permease protein           |
| ST2S            | ABC-type sugar transporter, substrate-binding protein  |
| ST3P            | ABC-type sugar transporter, permease protein           |
| ST3P1           | ABC-type sugar transporter, permease protein           |
| ST3S            | ABC-type sugar transporter, substrate-binding protein  |
| ST4P            | ABC-type sugar transporter, permease protein           |
| ST4P1           | ABC-type sugar transporter, permease protein           |
| ST4S            | ABC-type sugar transporter, substrate-binding protein  |
| ST5P            | ABC-type sugar transporter, permease protein           |
| ST5P1           | ABC-type sugar transporter, permease protein           |
| ST6P            | ABC-type sugar transporter, permease protein           |

|        |                                                       |
|--------|-------------------------------------------------------|
| ST6P1  | ABC-type sugar transporter, permease protein          |
| ST6S   | ABC-type sugar transporter, substrate-binding protein |
| ST7A   | ABC-type sugar transporter, ATP-binding protein       |
| ST7P   | ABC-type sugar transporter, permease protein          |
| T2SE   | type II/IV secretion system protein (PPA0041)         |
| T2SF1  | type II secretion system F domain protein (PPA0042)   |
| T2SF2  | type II secretion system F domain protein (PPA0043)   |
| TAG    | Triacylglycerol                                       |
| talAB  | transaldolase [EC:2.2.1.2]                            |
| TGL    | triacylglycerol lipase [EC:3.1.1.3]                   |
| UPGIII | Uroporphyrinogen III                                  |
| yajC   | preprotein translocase subunit YajC                   |
| yidC   | preprotein translocase subunit YidC                   |

274

275

276

277

278

279

280

281

282

283

284

285

286



287 **Table S4. The relative expression levels ( $\log_{10}$ ) of the vitamin B12 biosynthesis genes in the**  
 288 **skin microbiota of the healthy individuals and acne patients shown in Fig. 3.**

| Subject ID | Skin phenotype | Relative gene expression ( $\log_{10}$ ) |             |             |
|------------|----------------|------------------------------------------|-------------|-------------|
|            |                | <i>cysG+cbiX</i>                         | <i>cbiL</i> | <i>btuR</i> |
| HL138      | Healthy        | -4.23                                    | -4.00       | -4.66       |
| HL402      | Healthy        | -4.40                                    | -4.09       | -5.05       |
| HL403      | Healthy        | -4.25                                    | -4.06       | -5.23       |
| HL407      | Healthy        | -4.05                                    | -4.26       | -5.23       |
| HL413      | Healthy        | -3.82                                    | -3.35       | NA          |
| HL414      | Healthy        | -3.93                                    | -3.93       | -5.04       |
| HL415      | Healthy        | -4.17                                    | -4.14       | -4.86       |
| HL417      | Healthy        | -4.15                                    | -4.18       | -5.10       |
| HL418      | Healthy        | -3.55                                    | -3.49       | -4.93       |
| HL421      | Healthy        | -4.67                                    | -4.34       | -5.45       |
| HL422      | Healthy        | -4.01                                    | -4.00       | -4.94       |
| HL423      | Healthy        | -4.21                                    | -4.15       | -5.31       |
| HL424      | Healthy        | -3.07                                    | -2.80       | -4.39       |
| HL430      | Healthy        | -4.08                                    | -3.96       | -4.94       |
| HL431      | Healthy        | -4.03                                    | -4.07       | -4.78       |
| HL126      | Acne           | -5.34                                    | -5.06       | -5.49       |
| HL401      | Acne           | -4.53                                    | -4.42       | -5.48       |
| HL404      | Acne           | -4.68                                    | -4.34       | -5.00       |
| HL409      | Acne           | -4.60                                    | -4.46       | -5.17       |
| HL426      | Acne           | -3.97                                    | -3.87       | -4.81       |
| HL427      | Acne           | -4.34                                    | -4.35       | -4.88       |
| HL428      | Acne           | -4.70                                    | -4.31       | -5.01       |
| HL429      | Acne           | -4.66                                    | -4.39       | -5.44       |
| HL437      | Acne           | -4.48                                    | -4.24       | -5.12       |

289 NA: the qRT-PCR data not available.

290

291

292

293

294

295

296 **Table S5A. The relative expression levels ( $\log_{10}$ ) of the vitamin B12 biosynthesis genes in**  
 297 **the skin microbiota of the healthy subjects shown in Fig. 4.**

| Gene name        | Subject ID | Skin phenotype | Relative gene expression ( $\log_{10}$ ) |       |       |                     |       |       |
|------------------|------------|----------------|------------------------------------------|-------|-------|---------------------|-------|-------|
|                  |            |                | With vitamin B12                         |       |       | Without vitamin B12 |       |       |
|                  |            |                | Day0                                     | Day2  | Day14 | Day0                | Day2  | Day14 |
| <i>cysG+cbiX</i> | HL413      | Healthy        | -3.82                                    | -3.31 | -4.42 | -3.53               | -3.27 | -3.54 |
|                  | HL414      | Healthy        | -3.93                                    | -3.75 | -4.59 | -3.43               | -3.16 | -3.48 |
|                  | HL415      | Healthy        | -4.17                                    | -4.18 | -4.56 | -4.62               | -3.42 | -3.34 |
|                  | HL417      | Healthy        | -4.15                                    | -3.77 | -4.53 | -3.38               | -3.53 | -3.35 |
|                  | HL418      | Healthy        | -3.55                                    | -3.57 | -4.57 | -3.67               | -4.72 | -3.23 |
|                  | HL422      | Healthy        | -4.01                                    | -4.10 | -4.59 | -2.91               | -2.95 | -3.85 |
|                  | HL423      | Healthy        | -4.21                                    | -4.08 | -4.79 | -3.53               | -3.20 | NA    |
|                  | HL424      | Healthy        | -3.07                                    | -3.22 | -4.45 | NA                  | NA    | NA    |
|                  | HL430      | Healthy        | -4.08                                    | -4.49 | -4.49 | -3.70               | -4.12 | -3.02 |
| HL431            | Healthy    | -4.03          | -3.87                                    | -4.62 | -3.06 | -3.04               | -4.25 |       |
| <i>cbiL</i>      | HL413      | Healthy        | -3.35                                    | -3.01 | -4.31 | -3.45               | -3.27 | NA    |
|                  | HL414      | Healthy        | -3.93                                    | -3.92 | -4.62 | -3.31               | -2.65 | -3.23 |
|                  | HL415      | Healthy        | -4.14                                    | -4.17 | -4.55 | -4.92               | -3.15 | -3.85 |
|                  | HL417      | Healthy        | -4.18                                    | -3.52 | -4.65 | -3.60               | -3.72 | -3.36 |
|                  | HL418      | Healthy        | -3.49                                    | -3.53 | -4.46 | -3.86               | -4.81 | -3.24 |
|                  | HL422      | Healthy        | -4.00                                    | -4.04 | -4.56 | -3.28               | -3.15 | -3.90 |
|                  | HL423      | Healthy        | -4.15                                    | -3.91 | -4.61 | -3.70               | NA    | -3.72 |
|                  | HL424      | Healthy        | -2.80                                    | -2.73 | -4.37 | NA                  | NA    | NA    |
|                  | HL430      | Healthy        | -3.96                                    | -4.38 | -4.34 | -3.91               | -4.33 | -3.08 |
| HL431            | Healthy    | -4.07          | -3.77                                    | -4.55 | -3.20 | -3.31               | -4.57 |       |
| <i>btuR</i>      | HL413      | Healthy        | NA                                       | -3.67 | -5.43 | -4.50               | -4.35 | -3.91 |
|                  | HL414      | Healthy        | -5.04                                    | -4.68 | -5.28 | -4.67               | -2.32 | -5.55 |
|                  | HL415      | Healthy        | -4.86                                    | -5.35 | -5.74 | -5.85               | -4.16 | -4.65 |
|                  | HL417      | Healthy        | -5.10                                    | -4.81 | -5.48 | -4.21               | -4.66 | -4.73 |
|                  | HL418      | Healthy        | -4.93                                    | -4.69 | -5.41 | -4.62               | NA    | -4.59 |
|                  | HL422      | Healthy        | -4.94                                    | -5.06 | -5.51 | NA                  | -4.37 | -4.98 |
|                  | HL423      | Healthy        | -5.31                                    | -5.01 | -5.72 | -4.52               | NA    | -4.09 |
|                  | HL424      | Healthy        | -4.39                                    | -4.71 | -5.53 | NA                  | NA    | NA    |
|                  | HL430      | Healthy        | -4.94                                    | -5.42 | -5.18 | -4.64               | -4.19 | -4.28 |
| HL431            | Healthy    | -4.78          | -4.94                                    | -5.34 | -4.39 | -4.58               | -4.33 |       |

298 NA: sample or data not available.

299

300

301

302

303

304 **Table S5B. The relative expression levels ( $\log_{10}$ ) of the vitamin B12 biosynthesis genes in**  
 305 **the skin microbiota of the acne patients shown in Fig. 4.**

| Gene name        | Subject ID | Skin phenotype | Relative gene expression ( $\log_{10}$ ) |
|------------------|------------|----------------|------------------------------------------|
| <i>cysG+cbiX</i> | HL401      | Acne           | -4.53                                    |
|                  | HL426      | Acne           | -3.97                                    |
|                  | HL427      | Acne           | -4.34                                    |
|                  | HL428      | Acne           | -4.70                                    |
|                  | HL429      | Acne           | -4.66                                    |
|                  | HL437      | Acne           | -4.48                                    |
|                  | HL404      | Acne           | -4.68                                    |
|                  | HL409      | Acne           | -4.60                                    |
|                  | HL126      | Acne           | -5.34                                    |
| <i>cbiL</i>      | HL401      | Acne           | -4.42                                    |
|                  | HL426      | Acne           | -3.87                                    |
|                  | HL427      | Acne           | -4.35                                    |
|                  | HL428      | Acne           | -4.31                                    |
|                  | HL429      | Acne           | -4.39                                    |
|                  | HL437      | Acne           | -4.24                                    |
|                  | HL404      | Acne           | -4.34                                    |
|                  | HL409      | Acne           | -4.46                                    |
|                  | HL126      | Acne           | -5.06                                    |
| <i>btuR</i>      | HL401      | Acne           | -5.48                                    |
|                  | HL426      | Acne           | -4.81                                    |
|                  | HL427      | Acne           | -4.88                                    |
|                  | HL428      | Acne           | -5.01                                    |
|                  | HL429      | Acne           | -5.44                                    |
|                  | HL437      | Acne           | -5.12                                    |
|                  | HL404      | Acne           | -5.00                                    |
|                  | HL409      | Acne           | -5.17                                    |
|                  | HL126      | Acne           | -5.49                                    |

306

307

308

309

310

311

312

313 **Table S6. The differentially expressed OGU<sup>s</sup> in both the comparison between sample**  
 314 **HL414-Day14 and other Day14 samples and the comparison between Day0 and Day14**  
 315 **samples in the vitamin B12 supplementation study.**

| OGU <sup>§</sup> | Annotation                                        | HL414-Day14 vs. other Day14 samples |         |                     | Day0 vs. Day14 samples |                     |
|------------------|---------------------------------------------------|-------------------------------------|---------|---------------------|------------------------|---------------------|
|                  |                                                   | <i>P</i>                            | FDR     | Log <sub>2</sub> FC | <i>P</i>               | Log <sub>2</sub> FC |
| PPA0693          | 2-oxoglutarate dehydrogenase, E2 component        | 5.0E-03                             | 3.0E-02 | -0.3                | 4.0E-02                | -0.2                |
| PPA2220          | putative PRC-barrel domain protein                | 2.0E-06                             | 5.0E-04 | 1.1                 | 2.0E-02                | 0.3                 |
| PPA1377          | putative ATP-dependent RNA helicase               | 1.0E-03                             | 1.0E-02 | 0.5                 | 4.0E-02                | 0.3                 |
| PPA0563          | conserved hypothetical protein                    | 2.0E-03                             | 2.0E-02 | 0.3                 | 3.0E-02                | 0.3                 |
| PPA0480          | putative hypoxanthine/guanine permease            | 2.0E-03                             | 2.0E-02 | -0.4                | 4.0E-02                | -0.1                |
| PPA0329          | RNA polymerase sigma factor, sigma-70 family      | 4.0E-03                             | 3.0E-02 | 0.3                 | 1.0E-02                | 0.2                 |
| PPA1174          | conserved hypothetical protein                    | 1.0E-02                             | 5.0E-02 | -0.2                | 7.0E-03                | -0.5                |
| PPA0054          | ABC transporter, ATP-binding protein              | 5.0E-04                             | 7.0E-03 | 0.6                 | 3.0E-02                | 0.3                 |
| PPA2245          | zinc-binding alcohol dehydrogenase family protein | 1.0E-04                             | 4.0E-03 | 0.4                 | 3.0E-02                | 0.2                 |
| PPA0937          | putative metalloprotease                          | 7.0E-04                             | 9.0E-03 | -0.7                | 1.0E-02                | -0.3                |
| PPA1865          | ribosomal protein S10                             | 4.0E-03                             | 3.0E-02 | 0.4                 | 4.0E-02                | 0.3                 |

316 FDR: false discovery rate; Log<sub>2</sub>FC: log<sub>2</sub> transformed fold change.

317 <sup>§</sup>The gene from the *P. acnes* KPA171202 genome is used here to represent the OGU.

318

319

320

321

322

323

324 **Table S7. The relative expression levels ( $\log_{10}$ ) of the vitamin B12 biosynthesis genes in the**  
 325 ***P. acnes* cultures shown in Fig. 6A.**

| Gene name        | Relative gene expression ( $\log_{10}$ ) |       |        |                                          |       |        |
|------------------|------------------------------------------|-------|--------|------------------------------------------|-------|--------|
|                  | Medium                                   |       |        | Medium + 10 $\mu\text{g/mL}$ vitamin B12 |       |        |
|                  | Day 2                                    | Day 8 | Day 14 | Day 2                                    | Day 8 | Day 14 |
| <i>cysG+cbiX</i> | -4.06                                    | -4.50 | -5.15  | -4.33                                    | -5.24 | -5.96  |
|                  | -3.85                                    | -4.63 | -5.15  | -4.08                                    | -5.07 | -5.58  |
|                  | -3.36                                    | -4.45 | -5.55  | -3.85                                    | -4.77 | -6.43  |
| <i>cbiL</i>      | -4.23                                    | -4.77 | -5.19  | -4.63                                    | -5.40 | -5.79  |
|                  | -3.64                                    | -3.99 | -4.39  | -4.18                                    | -4.72 | -5.18  |
|                  | -3.43                                    | -3.74 | -4.95  | -3.91                                    | -3.97 | -5.60  |
| <i>btuR</i>      | -4.51                                    | -5.00 | -5.42  | -4.65                                    | -5.46 | -5.91  |
|                  | -3.84                                    | -4.74 | -5.23  | -4.03                                    | -5.02 | -5.90  |
|                  | NA                                       | -3.81 | -5.08  | NA                                       | -4.14 | -5.83  |

326 NA: qRT-PCR data not available.

327

328

329 **Table S8. The porphyrin levels detected in the *P. acnes* cultures shown in Fig. 6B.**

| Replicate | Porphyrin level normalized by bacterial culture density ( $\mu\text{M}$ ) |       |        |                                          |       |        |
|-----------|---------------------------------------------------------------------------|-------|--------|------------------------------------------|-------|--------|
|           | Medium                                                                    |       |        | Medium + 10 $\mu\text{g/mL}$ vitamin B12 |       |        |
|           | Day 2                                                                     | Day 8 | Day 14 | Day 2                                    | Day 8 | Day 14 |
| 1         | -0.67                                                                     | 9.80  | 9.90   | -0.30                                    | 11.97 | 11.18  |
| 2         | 0.03                                                                      | 9.31  | 9.14   | -0.26                                    | 12.21 | 11.34  |
| 3         | -0.44                                                                     | 8.44  | 9.55   | -0.91                                    | 12.51 | 11.50  |
| 4         | NA                                                                        | 7.64  | 8.97   | NA                                       | 12.20 | 10.71  |

330 NA: data not available.

331
